# Supplementary material
Source: publisher figshare collection journal article supplement (https://acs.figshare.com/ndownloader/files/8439713)
Supplement: Supplementary file 1 [file 8439713]

## Supporting information

### **High-throughput investigation of a lead-free AlN-based piezoelectric material, (Mg,Hf)<sub>x</sub>Al<sub>1-x</sub>N**

*Hung H. Nguyen,<sup>1\*</sup> Hiroyuki Oguchi,<sup>2</sup> Le Van Minh<sup>1</sup>, Hiroki Kuwano<sup>1</sup>*

<sup>1</sup>Department of Robotics, Tohoku University, Sendai, Japan

<sup>2</sup>Advanced Institute for Materials Research (AIMR), Tohoku University, Japan

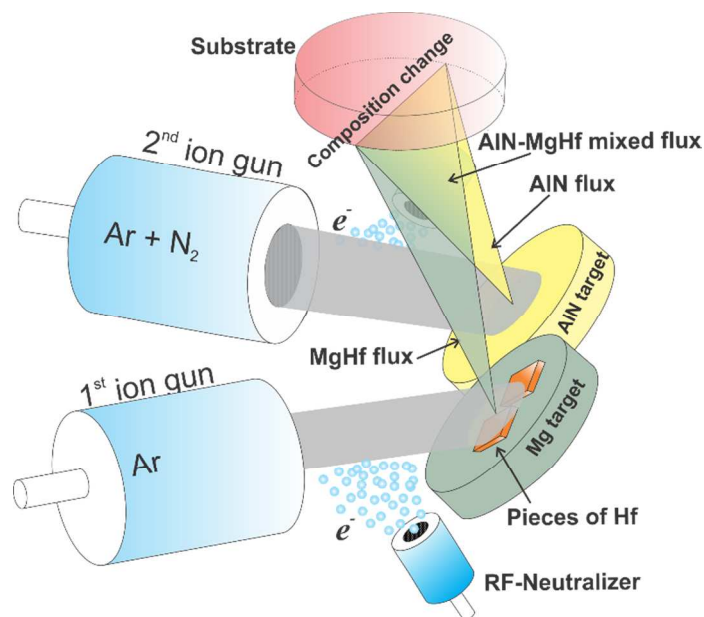

**Figure S1.** Schematic of combinatorial deposition using AlN target and Mg target with pieces of Hf on top.

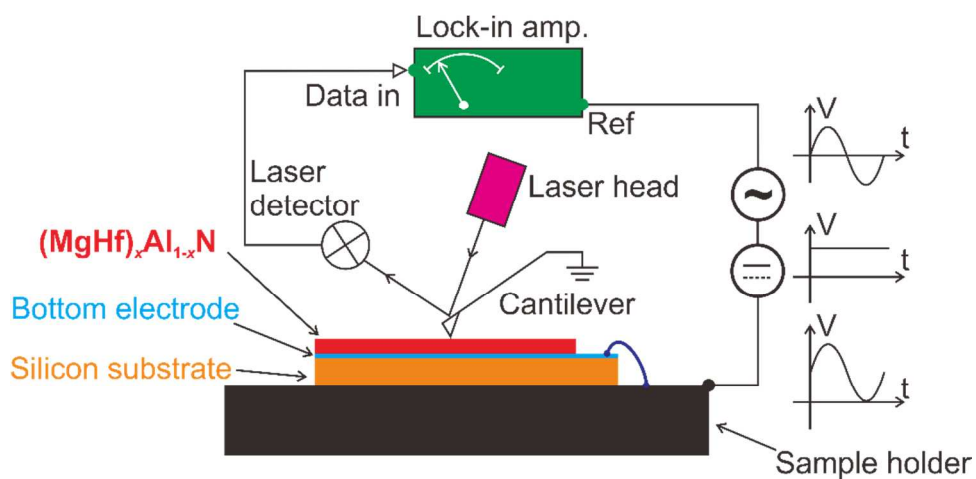

**Figure S2.** The illustration of PRM measurement, in which an AC voltage ( $V$ ) was applied along  $c$ -axis of the thin film by using an AFM conductive cantilever and bottom electrode. The AC voltage induce a displacement ( $D$ ) on sample surface which was accurately followed by the tip in contact mode. The amplitude of the tip vibration could be measured by lock-in technique. Thus, the piezoelectric coefficient of materials ( $d_{33}$ ) could be determined by  $d_{33} = D/V$ .

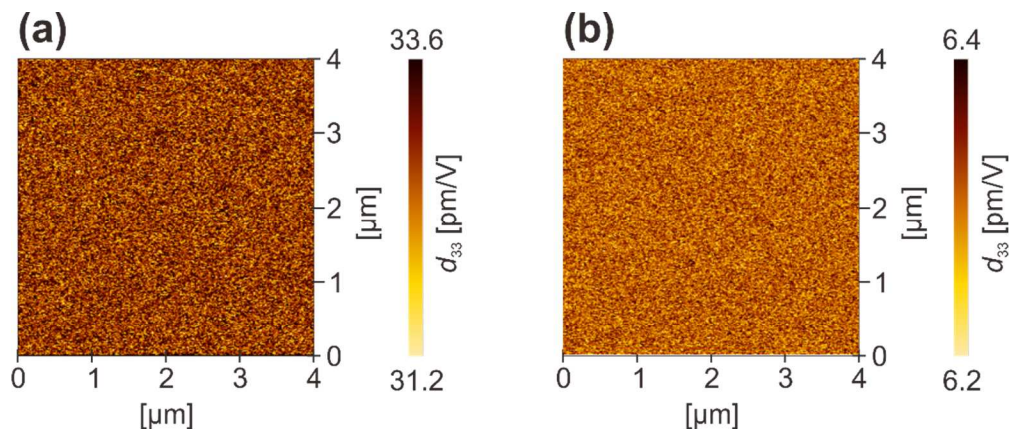

**Figure S3.** PRM images for LiNbO<sub>3</sub> (a) and SiO<sub>2</sub> (b) single crystal. The  $d_{33}$  values were determined by taking average for the observed area. The obtained values for LiNbO<sub>3</sub> and SiO<sub>2</sub> were 32.7 and 6.3 pm/V, respectively, which agree with widely accepted values.<sup>31, 32</sup>

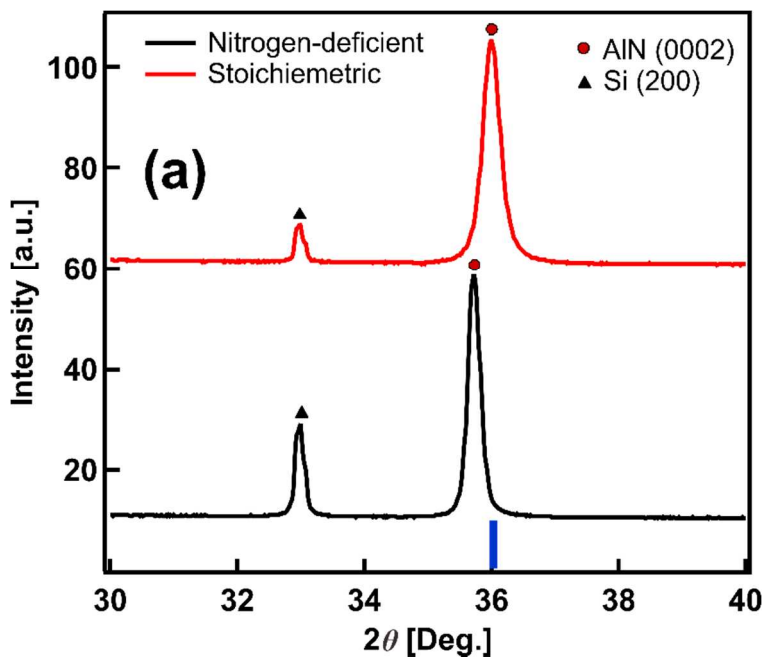

**Figure S4.** XRD patterns for AlN thin films with and without the nitrogen deficiency. Stoichiometry was confirmed by observing (0002) peak of the AlN at  $2\theta \sim 36^\circ$ , which corresponds to the reference peak position of hexagonal AlN (solid blue line).<sup>7, 8</sup>

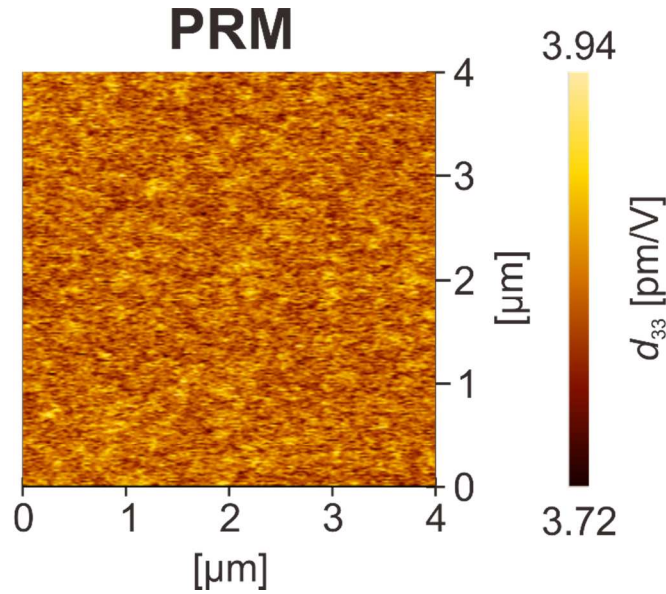

**Figure S5.** PRM image of stoichiometric AlN thin film. The average  $d_{33}$  value for measured area is 3.9 pm/V. The obtained value was comparable with reported value of AlN thin films.<sup>1, 7, 17</sup>

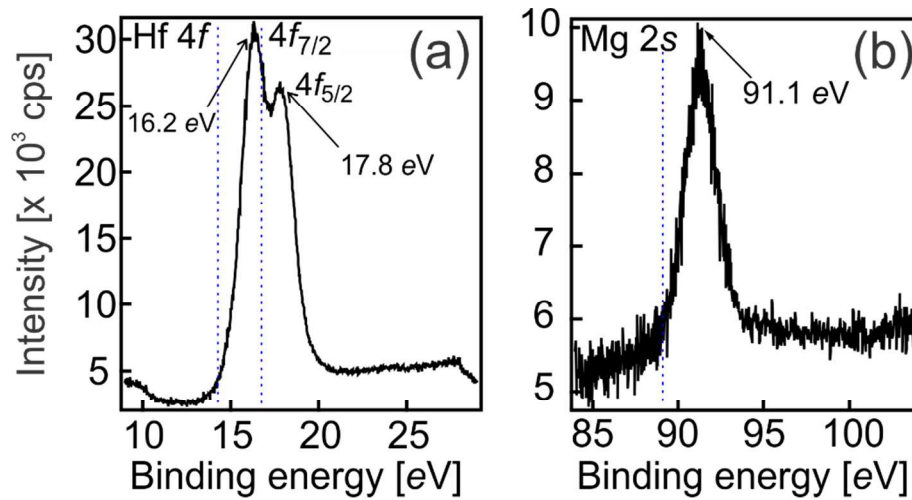

**Figure S6.** High-resolution XPS spectra of (a) Hf 4*f* and (b) Mg 2*s* core-levels obtained for the (Mg,Hf)<sub>x</sub>Al<sub>1-x</sub>N ( $x = 0.21$ ) film. Blue dotted lines denote reference peak positions. The peak positions were calibrated beforehand by using peak of carbon deposited on sample surface. The spectrum of Hf 4*f* (a) showed two singlet peaks located at 16.2 and 17.8 eV, corresponding to Hf 4*f*<sub>7/2</sub> and Hf 4*f*<sub>5/2</sub>, respectively. These values were 1.8 eV higher than those of the references for

metal Hf (14.4 eV for Hf  $4f_{7/2}$  and 16.0 eV for Hf  $4f_{5/2}$ ), and agreed well with the reported values for HfN film. Similarly, the XPS spectrum of Mg  $2s$  (b) showed a peak at 91.1 eV, which was shifted by 2.5 eV to a higher energy than that of Mg metal (88.6 eV). The size of this shift agreed well with the reported value for  $Mg_3N_2$ . These results indicated that Mg and Hf had directly replaced Al and formed bonds with nitrogen.

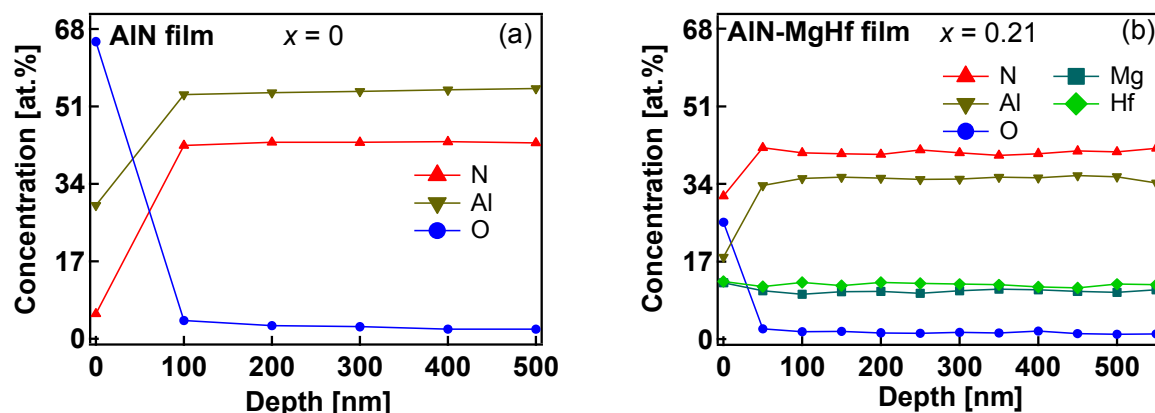

**Figure S7.** Depth profile of the  $(Mg,Hf)_xAl_{1-x}N$  films for  $x = 0$  (a) and  $x = 0.21$  (b) obtained by Ar ion sputtering at a sputtering rate of  $\sim 5$  nm/min using XPS. The higher levels of Al than N observed in these profiles indicated that the films were N-deficient. The extent of the deficiency was roughly uniform ( $\sim 13$  at.%) for different  $x$ .
